# Supplementary material for: CCR5/CCL5 axis interaction promotes migratory and invasiveness of pancreatic cancer cells
Source: PubMed Central journal article supplement (PMC5778036; doi:10.1038/s41598-018-19643-0), 2018-01-22

**CCR5 /CCL5 axis interaction promotes migratory and invasiveness of pancreatic cancer cells**

Santosh Kumar Singh<sup>1</sup>, Manoj K. Mishra<sup>2</sup>, Isam-Eldin A. Eltoun<sup>3</sup>, Sejong Bae<sup>4</sup>, James W. Lillard Jr.<sup>1</sup>, and Rajesh Singh<sup>1,\*</sup>

<sup>1</sup>Morehouse School of Medicine, Department of Microbiology, Biochemistry and Immunology, Atlanta, GA, 30310, USA

<sup>2</sup>Cancer Biology Research and Training Program, Department of Biological Sciences, Alabama State University, Montgomery, AL, 36101, USA

<sup>3</sup>Department of Pathology, University of Alabama at Birmingham, Birmingham, AL, 35294, USA

<sup>4</sup>Department of Medicine, University of Alabama at Birmingham, Birmingham, AL, 35294, USA

**Send correspondence to:** \*Rajesh Singh, Morehouse School of Medicine, Department of Microbiology, Biochemistry and Immunology, 720 Westview Drive SW, Atlanta GA 30310, Tel: 404-756-6661, Fax: 404-752-1179, E-mail: [rsingh@msm.edu](mailto:rsingh@msm.edu)

## Supplementary Figure 2B

**Supplementary Figure 2B: Expression of CCR5 by pancreatic cancer cells** (A) Western blot expression of CCR5 by pancreatic cancer cells (AsPC-1, BxPC-3 and MIA PaCa-2) was resolved by the SDS-PAGE gel. (B) Expression of  $\beta$ -actin was detected by western blot analysis with anti- $\beta$ -actin antibodies.  $\beta$ -actin was used as a loading control for all the three samples.

### CCR5 Expression

(A)

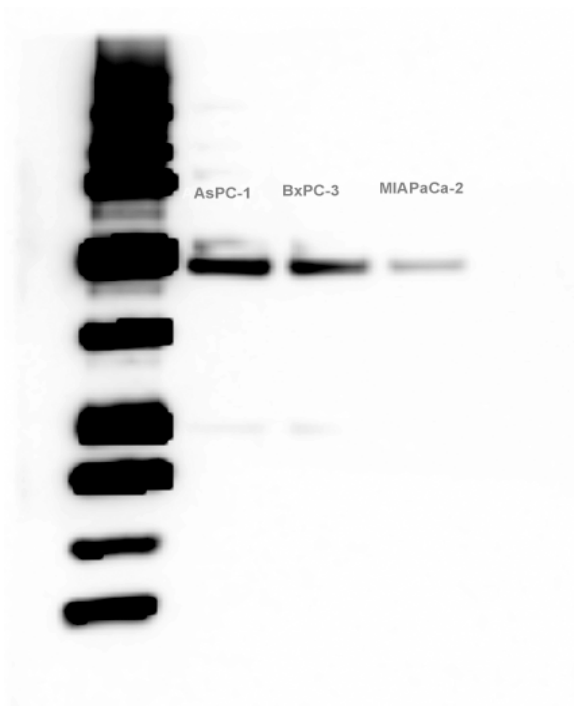

(B)  $\beta$ -Actin Expression

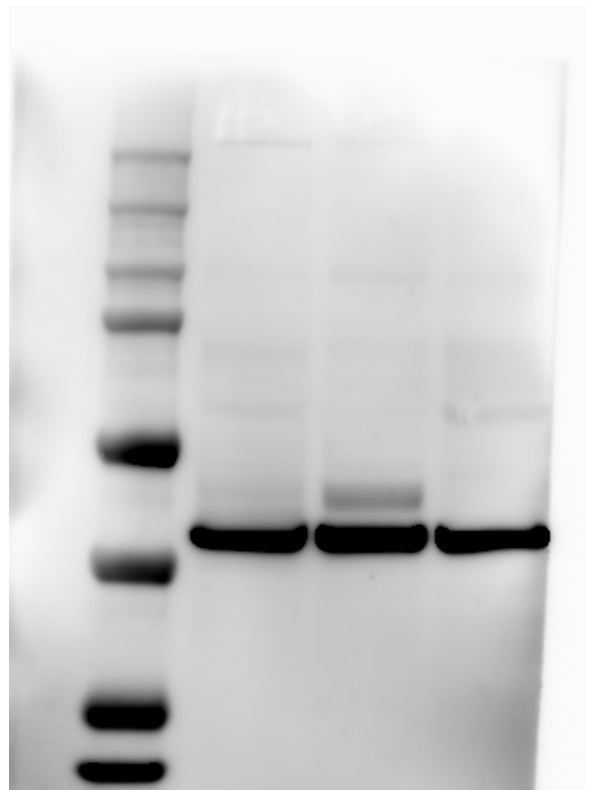

Supplement: 41598_2018_19643_MOESM1_ESM.pdf [file 41598_2018_19643_MOESM1_ESM.pdf]
